# Supplementary material for: Home health monitoring around the time of surgery: qualitative study of patients’ experiences before and after joint replacement
Source: PubMed Central journal article supplement (PMC6924768; doi:10.1136/bmjopen-2019-032205), 2019-12-15

Supplementary File 1 – Decision Coding Tree

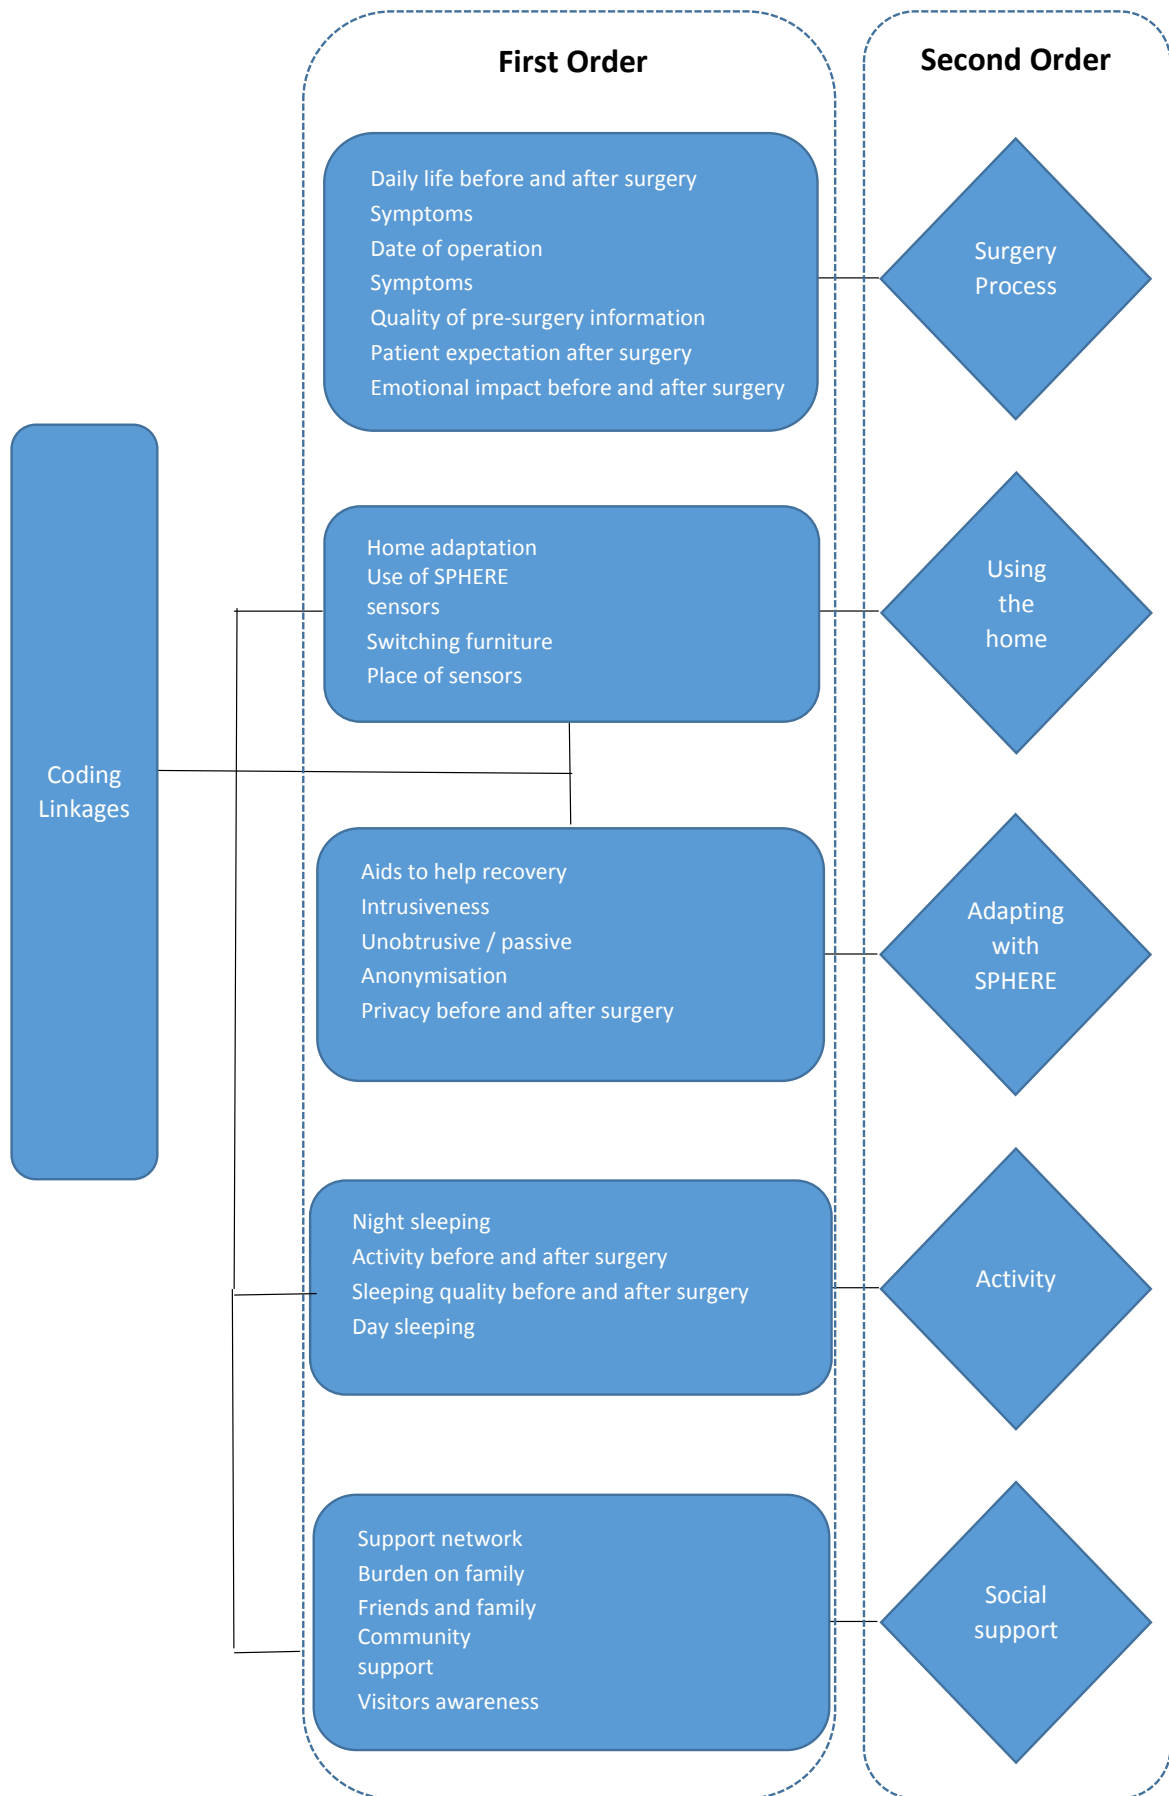

Supplement: bmjopen-2019-032205supp001.pdf [file bmjopen-2019-032205supp001.pdf]
